# Supplementary material
Source: Research Square preprint supplement (doi:10.21203/rs.3.rs-9648797/v1)

GAPDH

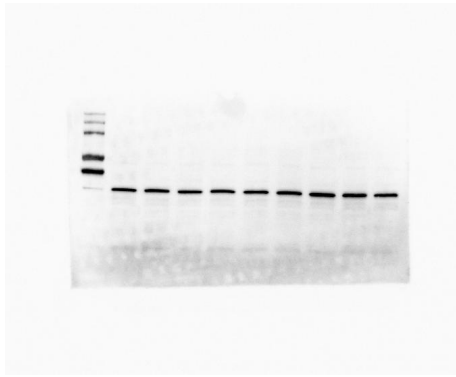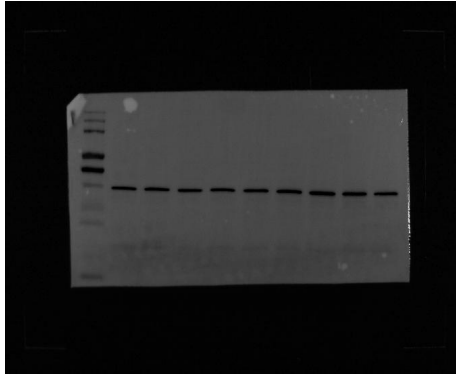

P53

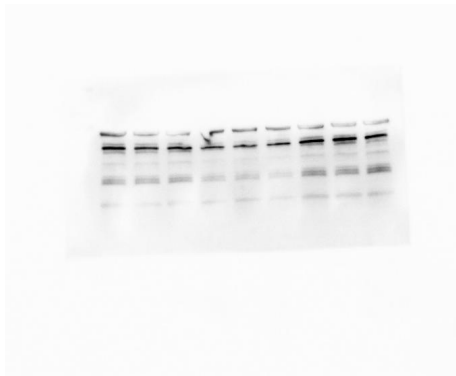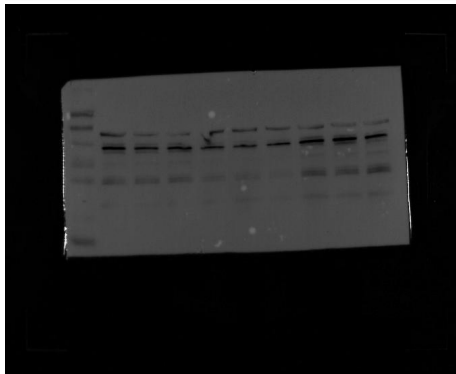

CCNB1

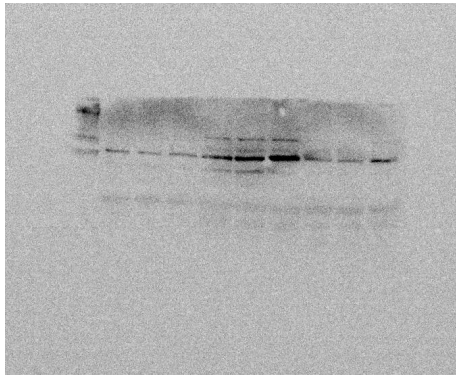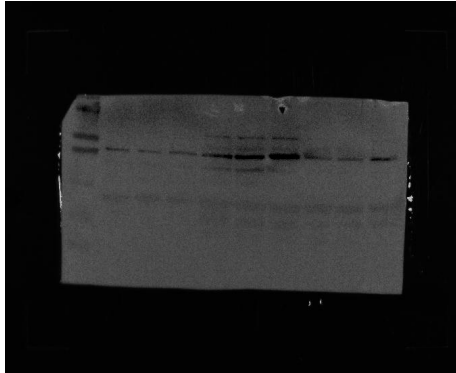

TGFB

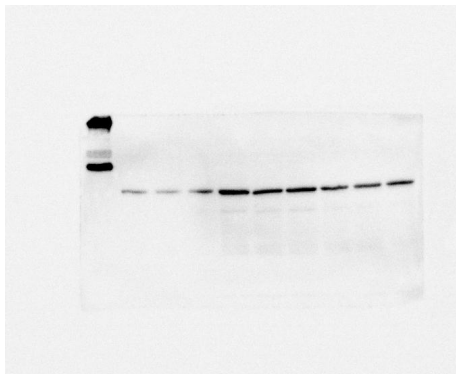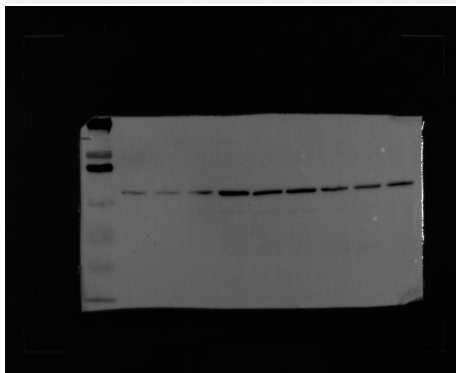

CDK1

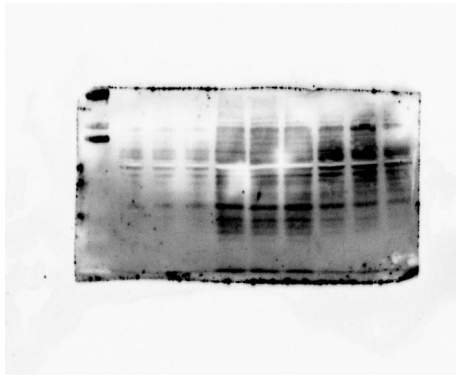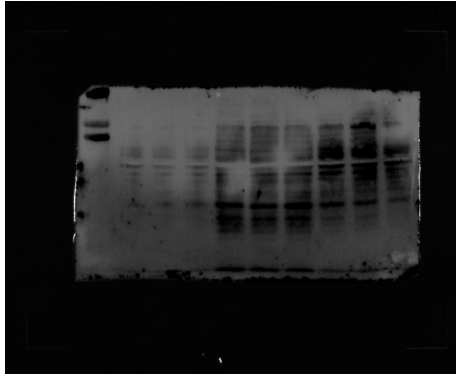

Il6

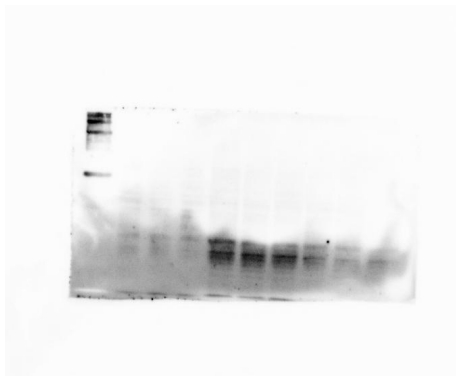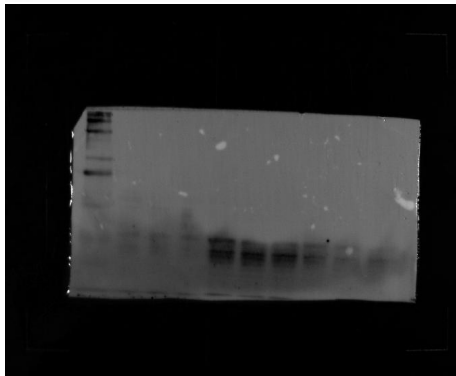

II10

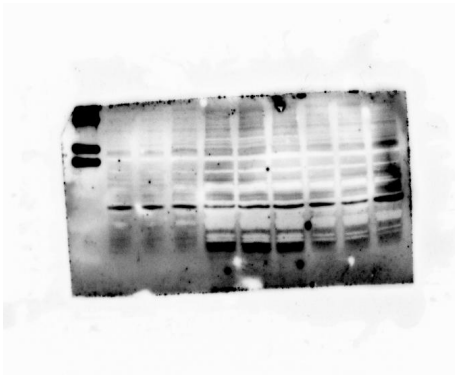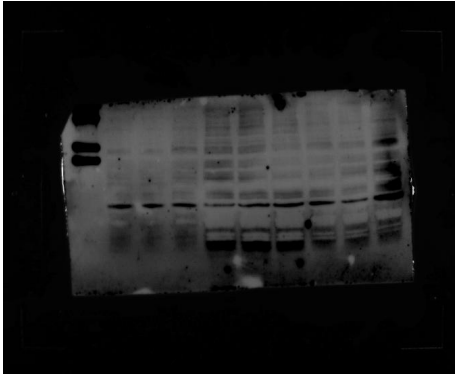

Tnfa

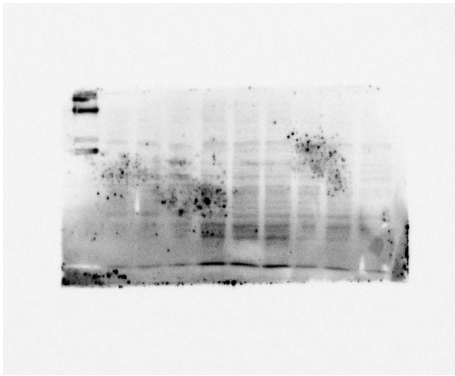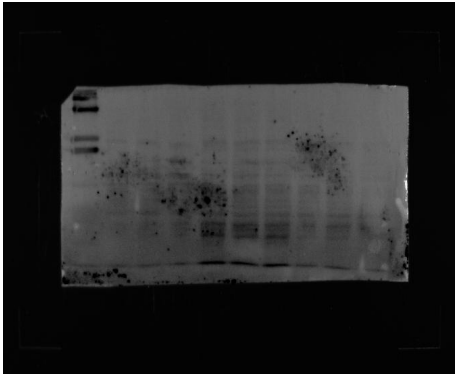

Supplement: Supplementary file 1 [file a6b3560c6493cad1a5a2dff3.pdf]
